# Supplementary material for: Texture analysis of intermediate-advanced hepatocellular carcinoma: prognosis and patients' selection of transcatheter arterial chemoembolization and sorafenib
Source: PubMed Central journal article supplement (PMC5514956; doi:10.18632/oncotarget.13675), 2016-11-29
Supplement: oncotarget-08-37855-s001.pdf [file oncotarget-08-37855-s001.pdf]

## Texture analysis of intermediate-advanced hepatocellular carcinoma: prognosis and patients' selection of transcatheter arterial chemoembolization and sorafenib

### Supplementary Materials

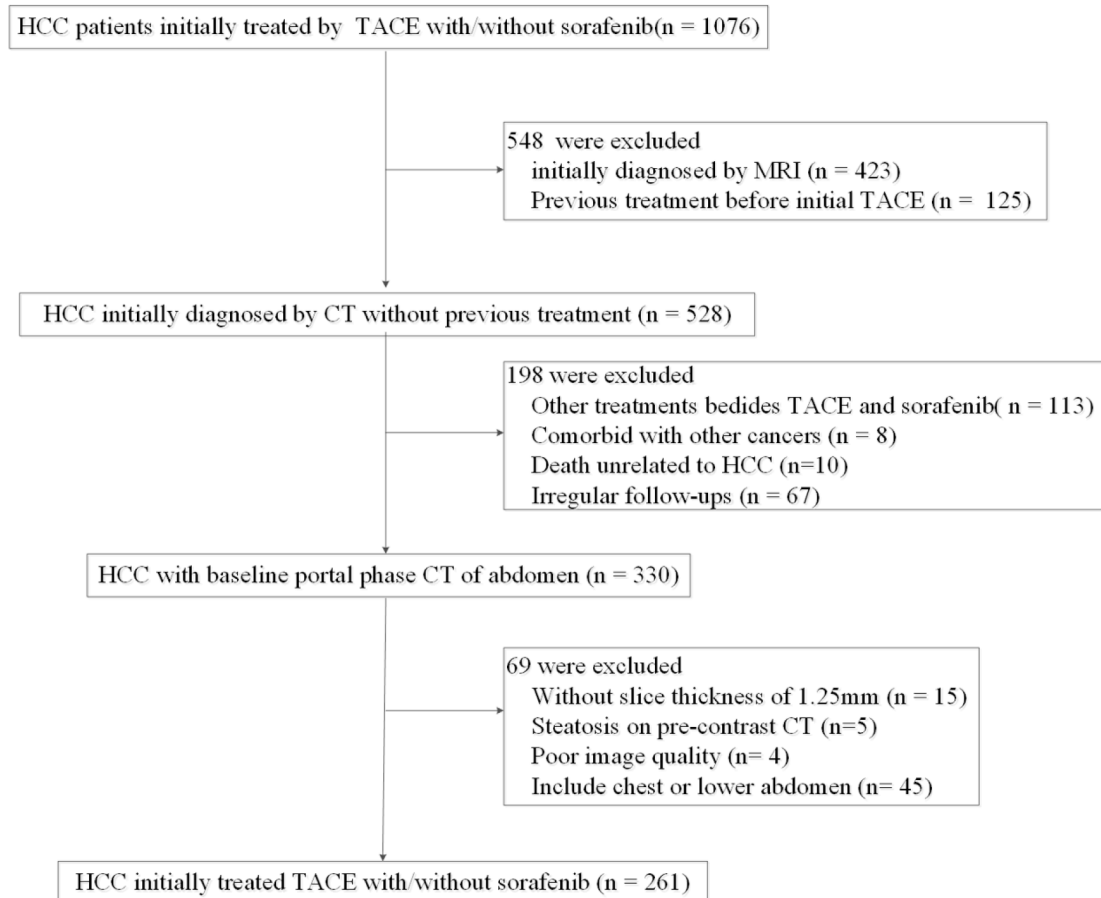

Abbreviations: HCC: hepatocellular carcinoma; CT: computer tomography; TACE: transcatheter arterial chemoembolization

**Supplementary Figure S1: Flowchart of patients' inclusion and exclusion.**

**Supplementary Table S1: Demographic and baseline characteristics of the patients.** see Supplementary\_Table\_S1

**Supplementary Table SE1: Univariate Cox regression for textural parameters in TTP and OS in TACE patients.**  
see Supplementary\_Table\_SE1

**Supplementary Table SE2: Univariate Cox regression of clinical factors for TTP and OS in TACE patients.**  
see Supplementary\_Table\_SE2

**Supplementary Table SE3: Multivariate Cox regression for TTP and OS in TACE patients**

| Cox model* | Gabor filter |                      |       | Wavelet transform |                      |       |
|------------|--------------|----------------------|-------|-------------------|----------------------|-------|
|            | Factors      | HR (95% CI)          | P     | Factors           | HR (95% CI)          | P     |
| <b>TTP</b> |              |                      |       |                   |                      |       |
| Filter 0   | Gabor-1-90   | 1.516 (1.049–2.191)  | 0.027 |                   | None identified      |       |
| Filter 1.0 | Gabor-1-135  | 2.543 (1.229–5.262)  | 0.012 | VI/EM             | 0.548 (0.313–0.962)  | 0.036 |
|            |              |                      |       | Wavelet-2-D       | 1.085 (1.022–1.153)  | 0.008 |
| Filter 1.5 | Gabor-1-135  | 5.276 (1.645–16.916) | 0.005 | Wavelet-2-D       | 1.119 (1.030–1.217)  | 0.008 |
| <b>OS</b>  |              |                      |       |                   |                      |       |
| Filter 0   |              | -                    |       |                   | -                    |       |
| Filter 1.0 |              | None identified      |       | Sex               | 4.056 (0.974–16.887) | 0.054 |
|            |              |                      |       | Wavelet-3-D       | 1.121 (1.004–1.251)  | 0.043 |
| Filter 1.5 |              | -                    |       |                   | -                    |       |

Abbreviations: \*Twelve separate multivariate cox regression analyses were performed: 6 for TTP and 6 for OS, and only variables with a statistical significance were listed; -waived due to the absence of identified textural parameters in univariate cox regressions.

TTP: time to progression; OS: Overall survival; TACE: transcatheter arterial chemoembolization; HR: hazard ratio; BCLC: Barcelona Clinic Liver Cancer; VI/EM: vascular invasion or extrahepatic metastasis;

**Supplementary Table SE4: Kaplan-Meier method and log-rank tests for subgroups by texture analysis**

|            | <b>Groups</b>                      | <b>Median#</b> | <b>P with T+S</b> |
|------------|------------------------------------|----------------|-------------------|
| <b>TTP</b> |                                    |                |                   |
|            | <b>T+S</b>                         | 140 (120–160)  |                   |
|            | <b>TACE</b>                        | 149 (110–188)  | 0.844             |
|            | Gabor-1-90 (filter 0) < 3.6190     | 199 (160–238)  | 0.135             |
|            | > 3.6190                           | 89 (77–101)    | < 0.001 *         |
|            | Gabor-1-135 (filter 1.0) < 1.3995  | 205 (126–284)  | 0.009*            |
|            | > 1.3995                           | 102 (77–127)   | 0.033*            |
|            | Gabor-1-135 (filter 1.5) < 0.5175  | 287 (189–385)  | 0.010*            |
|            | > 0.5175                           | 102 (77–125)   | 0.016*            |
|            | Wavelet-2-D (filter 1.0) < 18.3585 | 244 (167–321)  | 0.012*            |
|            | > 18.3585                          | 102 (88–116)   | 0.022*            |
|            | Wavelet-2-D (filter 1.5) < 6.7515  | 199 (154–244)  | 0.152             |
|            | > 6.7515                           | 98 (72–124)    | 0.049*            |
| <b>OS</b>  |                                    |                |                   |
|            | <b>T+S</b>                         | 612 (549–675)  |                   |
|            | <b>TACE</b>                        | 590 (524–656)  | 0.592             |
|            | Wavelet-3-D (filter 1.0) < 12.2620 | 711 (591–831)  | 0.072             |
|            | > 12.2620                          | 349 (248–450)  | < 0.001 *         |

Abbreviations: #Unit: days; \*with a statistical difference; T+S: TACE+sorafenib; TTP: time to progression; OS: overall survival; TACE: transcatheter arterial chemoembolization.
